# Supplementary material
Source: publisher site journal article supplement (https://www.dovepress.com/article/196383)
Supplement: Supplementary file 1 [file get_supplementary_file.php]

**TRIBUTE \_ IECs/IRBs**

| Site Country | Ethics Committee                                                                                | Chairperson               | Address                                                                                   |
|--------------|-------------------------------------------------------------------------------------------------|---------------------------|-------------------------------------------------------------------------------------------|
| Argentina    | Comité Independiente de Ética para Ensayos en Farmacología Clínica (FEFYM)                      | Luis M. Zieher            | Pte. J. E. Uriburu 774<br>Piso 1 (C1027AAP)<br>Ciudad Autónoma de Buenos Aires, Argentina |
| Argentina    | Comité Independiente de Ética para Ensayos en Farmacología Clínica (FEFYM)                      | Luis M. Zieher            | Pte. J. E. Uriburu 774<br>Piso 1 (C1027AAP)<br>Ciudad Autónoma de Buenos Aires, Argentina |
| Argentina    | Comité de Ética de Investigación<br>CER SALUD<br>Fundación Respirar Salud                       | Ariel Sanchez de Guinoa   | Hipólito Yrigoyen 856,<br>CP1878, Quilmes,<br>Buenos Aires, Argentina                     |
| Argentina    | Comité Independiente de Ética para Ensayos en Farmacología Clínica (FEFYM)                      | Luis M. Zieher            | Pte. J. E. Uriburu 774<br>Piso 1 (C1027AAP)<br>Ciudad Autónoma de Buenos Aires, Argentina |
| Argentina    | Comité Independiente de Ética para Ensayos en Farmacología Clínica (FEFYM)                      | Luis M. Zieher            | Pte. J. E. Uriburu 774<br>Piso 1 (C1027AAP)<br>Ciudad Autónoma de Buenos Aires, Argentina |
| Argentina    | Comité de Ética en Investigación - INAER                                                        | Gustavo Hernán Cerezo     | Arenales 3146 1ro B,<br>C1425BEN, CABA,<br>Argentina                                      |
| Argentina    | Comité de Ética de Diagnostico Maipu CEDIMA<br>Sala de Docencia e Investigación (T&R committee) | Graciela Fernández Alonso | Av Maipú 1688,<br>CP1636, Vicente Lopez,<br>Buenos Aires, Argentina                       |
| Argentina    | Comité de Ética de San Isidro CESI                                                              | Mariana Vazquez Durán     | Av Libertador 16958,<br>CP1643 San isidro,<br>Buenos Aires, Argentina                     |
| Argentina    | Comité Independiente de Ética para Ensayos en Farmacología Clínica (FEFYM)                      | Luis M. Zieher            | Pte. J. E. Uriburu 774<br>Piso 1 (C1027AAP)<br>Ciudad Autónoma de Buenos Aires, Argentina |
| Argentina    | Comité de Ética en Investigación - Instituto de Investigaciones Clínicas                        | Jesus Vazquez             | Av Colón 3364<br>B7600FZN Mar del Plata, Buenos Aires, Argentina                          |
| Argentina    | Comité Independiente de Ética para Ensayos en Farmacología Clínica (FEFYM)                      | Luis M. Zieher            | Pte. J. E. Uriburu 774<br>Piso 1 (C1027AAP)<br>Ciudad Autónoma de Buenos Aires, Argentina |
| Argentina    | FUNDACIÓN FAVALORO<br>HOSPITAL<br>UNIVERSITARIO<br>Comité de Bioética                           | Roberto Cambariere        | Avda Belgrano 1782 3er piso, CABA, Argentina                                              |
| Argentina    | Comité Independiente de Revisión y Ética - CIRE                                                 | Rodolfo Rey               | Av. Pedro Goyena 551,<br>C1424CSF, CABA,<br>Argentina                                     |

**TRIBUTE \_ IECs/IRBs**

| Site Country     | Ethics Committee                                                           | Chairperson                      | Address                                                                                   |
|------------------|----------------------------------------------------------------------------|----------------------------------|-------------------------------------------------------------------------------------------|
| <b>Argentina</b> | Comité Independiente de Ética para Ensayos en Farmacología Clínica (FEFYM) | Luis M. Zieher                   | Pte. J. E. Uriburu 774<br>Piso 1 (C1027AAP)<br>Ciudad Autónoma de Buenos Aires, Argentina |
| <b>Argentina</b> | CECIC – Comité de Ética de CER                                             | Damián del Percio                | Vicente López 1441<br>Quilmes, Buenos Aires, Argentina                                    |
| <b>Argentina</b> | Comité de Ética e Investigación, Instituto Ave Pulmo                       | Carlos Maria de la Vega          | Alvear 3345, CP 7600<br>Mar del Plata, Buenos Aires, Argentina                            |
| <b>Austria</b>   | Ethik-Kommission des Landes Oberosterreich                                 | Univ.-Prof. Dr. Johannes Fischer | p.A. 00. Landes-Nervenlinik Wagner-Jauregg Wagner-Jauregg Weg 15<br>4020 Linz Osterreich  |
| <b>Bulgaria</b>  | ETHICS COMMITTEE FOR MULTICENTER TRIALS (Delovodstvo)                      | Chairman Dr. Boyan Doganov       | 5, SVETA NEDELYA SQUARE<br>SOFIA, 1000 Sofia                                              |
| <b>Bulgaria</b>  | LEC to Hospital Lozenetz                                                   | Gergana Lazarova                 | 1, Koziak str., 1407<br>Sofia                                                             |
| <b>Bulgaria</b>  | LEC to SHATPPD – Dr. Dimitar Gramatikov – Ruse                             | Dr. Dimitar Getov                | 1, Aleya Liliya str., 7002<br>Ruse                                                        |
| <b>Bulgaria</b>  | LEC to MMA MHAT Sofia                                                      | Prof. Nikolay Petrov             | 3, Georgi Sofiyski Str. 3,<br>1606, Sofia                                                 |
| <b>Bulgaria</b>  | LEC to MC Asklepii OOD<br>Emiliya Milanova-Secretary                       | Dr. Krum Bonev                   | 1, Svoboda square,<br>2600, Dupnitsa                                                      |
| <b>Bulgaria</b>  | LEC to MC Kissiovi OOD                                                     | Dr. Stefan Kissiov               | 43A Gabrovo str.,9000,<br>Varna                                                           |
| <b>Bulgaria</b>  | LEC SHATPD Sveta Sofia EAD                                                 | Assoc. Prof. Rosen Petkov        | 19, Ivan Geshov blvd.,<br>1612, Sofia                                                     |
| <b>Bulgaria</b>  | LEC to UMHAT Sv. Georgi EAD                                                | Prof. Dr. Zhanet Grudeva         | 66, Peshtersko shose<br>blvd., 4002, Plovdiv                                              |
| <b>Bulgaria</b>  | LEC to MHAT Prof. Dr. Stoyan Kirkovich                                     | Dr. Mariana Valcheva             | 2, Gen. Stoletov blvd.,<br>6000, Stara Zagora                                             |
| <b>Bulgaria</b>  | LEC to MC Fama Medical EOOD                                                | Dr. Anton Todorov                | 20, Kavala Str., 4000,<br>Plovdiv                                                         |
| <b>Bulgaria</b>  | LEC to MC New Rehabilitation Center EOOD                                   | Dr. Mitka Koleva                 | 88, Stefan Karadzha Str,<br>6000, Stara Zagora                                            |

## TRIBUTE \_ IECs/IRBs

| Site Country | Ethics Committee                           | Chairperson                    | Address                                                                   |
|--------------|--------------------------------------------|--------------------------------|---------------------------------------------------------------------------|
| Bulgaria     | LEC to SHATPPD – Sofia City EOOD           | Dr. Antonina Gocheva           | SHATPPD – Sofia City EOOD 78, Sv. Sv. Kiril and Metodiy str., 1202, Sofia |
| Bulgaria     | LEC to MC St. Ivan Rilski OOD              | Dr. Cvetanka Yonikova          | 16/4, Bdin str. 3700, Vidin                                               |
| Bulgaria     | LEC to MC Tara OOD                         | Dr. Todor Bakardjiev           | 9G, Marno pole str., Veliko Tarnovo, 5000, Bulgaria                       |
| Bulgaria     | LEC to UMHAT “Dr. Georgi Stranski” EAD     | Assoc. Prof. Pavlina Glogovska | 8A, Georgi Kochev blvd., 5800, Pleven                                     |
| Bulgaria     | LEC to SHATPPD Sofia Region EOOD           | Dr. Nadya Spasova              | 309, Slivnitsa blvd., 1202, Sofia                                         |
| Bulgaria     | LEC to Aleksandrovska University Hospital  | Prof. Zdravko Kamenov          | Georgi Sofiiski str. 1 Sofia 1430                                         |
| Bulgaria     | V-Th Mhat - Sofia                          | Krasimira Dimova               | 67a Stoletov Blvd Sofia Bulgaria 1233                                     |
| Bulgaria     | LEC to MHAT Tokuda Hospital Sofia          | Prof. Ivan Staikov             | 51B, Nikola Vaptsatov Blvd., 1407, Sofia                                  |
| Bulgaria     | LEC to MHAT Prof. Dr. Paraskev Stoyanov AD | Dr. Aleksii Delchev            | 27, Syiko Syev str., 5500, Lovech                                         |
| Bulgaria     | LEC to MHAT Sveta Petka AD                 | Eli Popvasilu                  | 119, Tsar Simeon Veliki str, 3700 Vidin                                   |
| Bulgaria     | LEC to MHAT Dr. Stamen Iliev AD            | Ivan Georgiev                  | 4, Sirma Voivoda str., 3400, Montana                                      |
| Bulgaria     | LEC to MHAT Dr. Tota Venkova AD            | Dr. Kiril Rachev               | 1, Dr. Iliev-Detskia str., 5300, Gabrovo                                  |
| Bulgaria     | LEC to MHAT Dr. Nikola Vasilev AD          | Tsvetanka Portarska            | "1 ""17 January"" Square" Kyustendil Kyustendil 2500                      |

**TRIBUTE \_ IECs/IRBs**

| Site Country          | Ethics Committee                                                                                       | Chairperson                                     | Address                                                                        |
|-----------------------|--------------------------------------------------------------------------------------------------------|-------------------------------------------------|--------------------------------------------------------------------------------|
| <b>Bulgaria</b>       | LEC to MHAT Shumen AD                                                                                  | Dr. Nedko Todorov                               | 63, Vasil Aprilov str.,<br>9700 Shumen                                         |
| <b>Bulgaria</b>       | LEC to DCC 2 – Sofia EOOD                                                                              | Varta Kirkorian                                 | 1, Han Krum str., 1000<br>Sofia                                                |
| <b>Bulgaria</b>       | LEC to "MHAT ""Sv.Ivan Rilski""-Kozloduy EOOD"                                                         | Biliyana Stoyanovska                            | 1, Kiril and Metodiy str<br>Kozloduy<br>Vratca<br>3320                         |
| <b>Bulgaria</b>       | LEC to MC Re Spiro OOD                                                                                 | Dr. Steliana Kircheva                           | 1, Momina cheshma sq.,<br>7200, Razgrad                                        |
| <b>Chile</b>          | Comité de Ética Científico Adultos<br>Servicio de Salud Metropolitano Oriente<br>Hospital del Salvador | Dr. Sara Chernilo                               | Salvador 364 - Santiago<br>- Chile                                             |
| <b>Chile</b>          | Comité de Ética Científico Adultos<br>Servicio de Salud Metropolitano Oriente<br>Hospital del Salvador | Dr. Sara Chernilo                               | Salvador 364 - Santiago<br>- Chile                                             |
| <b>Chile</b>          | Comite Etico Cientifico Hospital Dr.Gustavo Fricke<br>Servicio de Salud Vina-Quillota                  | Dr. Héctor Camerati Villar                      | Calle Limache 1307,<br>esquina Peñablanca, 2º<br>Piso, Viña del Mar -<br>Chile |
| <b>Chile</b>          | Comité de Ética Científico Adultos<br>Servicio de Salud Metropolitano Oriente<br>Hospital del Salvador | Dr. Sara Chernilo                               | Salvador 364 - Santiago<br>- Chile                                             |
| <b>Croatia</b>        | Central Ethics Committee,<br>Agency for Medicinal Products and Medical Devices of Croatia              | Asst. Prof. Suzana Mimica Matanović,<br>MD, PhD | Ksaverska cesta 4<br>10000 Zagreb<br>Republic of Croatia                       |
| <b>Czech Republic</b> | Eticka komise FN Brno                                                                                  | Dr. Šárka Kozáková,<br>MBA                      | Jihlavska 20<br>625 00 Brno Ceska<br>republika                                 |
| <b>Czech Republic</b> | Etická komise Nemocnice Kyjov                                                                          | Dr. Josef Blažek                                | Strážovská 1247<br>697 01 Kyjov                                                |
| <b>Czech Republic</b> | Etická komise Nemocnice Nový Jičín a.s.                                                                | Dr. Marie Selerová,<br>Ph.D.                    | Purkyňova 2138/16<br>741 01 Nový Jičín                                         |
| <b>Czech Republic</b> | Etická komise Slezská nemocnice v Opavě                                                                | Dr. Marie Zajícová                              | Olomoucká 470/86,<br>Předměstí<br>746 01 Opava                                 |

**TRIBUTE \_ IECs/IRBs**

| Site Country   | Ethics Committee                                                                                                          | Chairperson                             | Address                                                         |
|----------------|---------------------------------------------------------------------------------------------------------------------------|-----------------------------------------|-----------------------------------------------------------------|
| <b>Denmark</b> | De Videnskabetiske Komiteer for Region Hovedstaden                                                                        | Henrik Enghusen Poulsen                 | Regionsgaarden<br>Kongens Vaenge 2<br>3400 Hilleroed<br>Denmark |
| <b>France</b>  | Ile-de-France 3 EC<br>Hôpital Tarnier                                                                                     | Pr Boyan<br>CHRISTOFOROV                | 89 rue d'Assas<br>75006 Paris                                   |
| <b>Germany</b> | Landesamt für Gesundheit und Soziales,<br>Geschäftsstelle der Ethik-Kommission des Landes Berlin                          | Prof Dr Thomas Moesta                   | Fehrbelliner Platz 1<br>10639 Berlin                            |
| <b>Germany</b> | Ethikkommission der Landesärztekammer in Hessen                                                                           | Dr Sebastian Harder                     | Im Vogelsgesang 3,<br>60788 Frankfurt                           |
| <b>Germany</b> | Ethikkommission bei der Sächsischen Landesärztekammer Dresden,                                                            | Dr med Bernd Terhag                     | Schützenhöhe 16,<br>01099 Dresden                               |
| <b>Germany</b> | Landesamt für Gesundheit und Soziales,<br>Geschäftsstelle der Ethik-Kommission des Landes Berlin                          | Prof Dr Thomas Moesta                   | Fehrbelliner Platz 1<br>10639 Berlin                            |
| <b>Germany</b> | Ethikkommission bei der Ärztekammer Niedersachsen,<br>Unterkommission zur Beurteilung medizinischer Forschung am Menschen | Herr Kai Bogs                           | Berliner Allee 20, 30175<br>Hannover                            |
| <b>Germany</b> | Landesamt für Gesundheit und Soziales,<br>Geschäftsstelle der Ethik-Kommission des Landes Berlin                          | Prof Dr Thomas Moesta                   | Fehrbelliner Platz 1<br>10639 Berlin                            |
| <b>Germany</b> | Ethikkommission bei der Sächsischen Landesärztekammer Dresden,                                                            | Dr med Bernd Terhag                     | Schützenhöhe 16,<br>01099 Dresden                               |
| <b>Germany</b> | Ethikkommission der Georg-August-Universität Göttingen                                                                    | Prof Dr Jürgen Brockmüller              | Von-Siebold-Straße 3,<br>37075 Göttingen                        |
| <b>Germany</b> | Ethikkommission der Universität zu Lübeck                                                                                 | Prof Dr A. Katalinic                    | Ratzeburger Allee 16,<br>23538 Lübeck                           |
| <b>Germany</b> | Ethikkommission der Ärztekammer Nordrhein,                                                                                | Prof Dr med Bernd Terhaag               | Tersteegenstrasse 9,<br>40474 Düsseldorf                        |
| <b>Germany</b> | Ethikkommission an der Medizinischen Fakultät der Rheinischen Friedrich-Wilhelms-Universität Bonn                         | Dr Kurt Racke, CEO<br>Frau Monika Braun | Biomedizinisches Zentrum, Sigmund-Freud-Str. 25, 53105<br>Bonn  |

**TRIBUTE \_ IECs/IRBs**

| Site Country | Ethics Committee                                                                                                       | Chairperson           | Address                           |
|--------------|------------------------------------------------------------------------------------------------------------------------|-----------------------|-----------------------------------|
| Germany      | Ethikkommission bei der Sächsischen Landesärztekammer Dresden,                                                         | Fra Anke Schmieder    | Schützenhöhe 16, 01099 Dresden    |
| Germany      | Landesamt für Gesundheit und Soziales, Geschäftsstelle der Ethik-Kommission des Landes Berlin                          | Prof Dr Thomas Moesta | Fehrbelliner Platz 1 10639 Berlin |
| Germany      | Ethikkommission des Landes Sachsen-Anhalt c/o Landesamt für Verbraucherschutz                                          | Herr Henning Richter  | Kühnauer Straße 70, 06846 Dessau  |
| Germany      | Ethikkommission der Bayerischen Landesärztekammer                                                                      | Prof Dr Harsford      | Mühlbaurst. 16, 81677 München     |
| Germany      | Landesamt für Gesundheit und Soziales, Geschäftsstelle der Ethik-Kommission des Landes Berlin                          | Prof Dr Thomas Moesta | Fehrbelliner Platz 1 10639 Berlin |
| Germany      | Ethikkommission bei der Ärztekammer Niedersachsen, Unterkommission zur Beurteilung medizinischer Forschung am Menschen | Herr Kai Bog          | Berliner Allee 20, 30175 Hannover |
| Germany      | Landesamt für Gesundheit und Soziales, Geschäftsstelle der Ethik-Kommission des Landes Berlin                          | Prof Dr Thomas Moesta | Fehrbelliner Platz 1 10639 Berlin |
| Germany      | Ethikkommission der Landesärztekammer Brandenburg                                                                      | Dr Michael Matthias   | Dreifertstraße 12, 03044 Cottbus  |
| Germany      | Ethikkommission des Landes Sachsen-Anhalt c/o Landesamt für Verbraucherschutz                                          | Herr Henning Richter  | Kühnauer Straße 70, 06846 Dessau  |
| Germany      | Ethikkommission bei der Sächsischen Landesärztekammer Dresden,                                                         | Frau Anne Hostmann    | Schützenhöhe 16, 01099 Dresden    |
| Germany      | Ethikkommission bei der Landesärztekammer Baden-Württemberg                                                            | Frau Sandra Lux       | Jahnstraße 40, 70591 Stuttgart    |
| Germany      | Ethikkommission der Ärztekammer Hamburg                                                                                | Dr Rolf Stahl         | Weidestr. 122b, 22083 Hamburg     |

**TRIBUTE \_ IECs/IRBs**

| Site Country   | Ethics Committee                                                                                                                          | Chairperson               | Address                                                                                                                     |
|----------------|-------------------------------------------------------------------------------------------------------------------------------------------|---------------------------|-----------------------------------------------------------------------------------------------------------------------------|
| <b>Hungary</b> | Medical Research Council, Ethics Committee for Clinical Pharmacology (CEC)                                                                | Péter Arányi, PhD, DSc    | Arany János u. 6-8., 1051 Budapest, Hungary (CEC)                                                                           |
| <b>Italy</b>   | Comitato di Etico Palermo 1, AOUP Paolo Giaccone di Palermo                                                                               | Salvatore Leone           | Via del Vespro, 129, 90127 Palermo                                                                                          |
| <b>Italy</b>   | Comitato Etico Campania Nord                                                                                                              | Nicola Cantore            | Azienda Ospedaliera "San Giuseppe Moscati" Di Avellino; Contrada Amoretta - Citta Ospediliera - Pal. Uffici; 83100 Avellino |
| <b>Italy</b>   | Comitato Etico Ospedali Riuniti di Foggia                                                                                                 | Maria Rosaria Castrignano | Viale Luigi Pinto 1 71100 Foggia                                                                                            |
| <b>Italy</b>   | Comitato Etico, Fondazione "S.Maugeri" Clinica del lavoro e della Riabilitazione                                                          | Carlo Pasetti             | IRCCS Centro di Pavia, Via Salvatore Maugeri 4, 27100 Pavia                                                                 |
| <b>Italy</b>   | Comitato Etico, Fondazione "S.Maugeri" Clinica del lavoro e della Riabilitazione                                                          | Carlo Pasetti             | IRCCS Centro di Pavia, Via Salvatore Maugeri 4, 27100 Pavia                                                                 |
| <b>Italy</b>   | Comitato Etico IRCCS Pascale c/o Istituto Nazionale Tumori IRCCS "Fondazione G. Pascale"                                                  | Francesco Paolo Casavola  | Via Mariano Semmola 80131 Napoli                                                                                            |
| <b>Italy</b>   | Comitato Etico Area Vasta Nord Ovest                                                                                                      | Romano Danesi             | c/o Azienda Ospedaliero Universitaria Pisana, Via Roma, 67, 56126 Pisa                                                      |
| <b>Italy</b>   | Comitato Etico Istituto Tumori "G. Paolo II" di Bari                                                                                      | Alessandro Dell'Erba      | Viale Orazio Flacco 65 70124 BARI                                                                                           |
| <b>Italy</b>   | Comitato Etico, Fondazione "S.Maugeri" Clinica del lavoro e della Riabilitazione                                                          | Carlo Pasetti             | IRCCS Cenrtro di Pavia, Via Salvatore Maugeri 4, 27100 Pavia                                                                |
| <b>Italy</b>   | Comitato Etico, Fondazione "S.Maugeri" Clinica del lavoro e della Riabilitazione                                                          | Carlo Pasetti             | IRCCS Centro di Pavia, Via Salvatore Maugeri 4, 27100 Pavia                                                                 |
| <b>Italy</b>   | Comitato Etico Regionale della Liguria                                                                                                    | Fulvio Brema              | Largo Rosanna Benzi 10, 16132 Genova                                                                                        |
| <b>Italy</b>   | Comitato etico per la Sperimentazione Clinica (CESC) delle Province di Verona e Rovigo Azienda Ospedaliera Universitaria Integrata Verona | Roberto Leone             | Piazzale Aristide Stefani, 1 37126 Verona                                                                                   |

**TRIBUTE \_ IECs/IRBs**

| Site Country  | Ethics Committee                                                                                                                    | Chairperson                       | Address                                                                                                                                 |
|---------------|-------------------------------------------------------------------------------------------------------------------------------------|-----------------------------------|-----------------------------------------------------------------------------------------------------------------------------------------|
| <b>Italy</b>  | Comitato Etico; Azienda Ospedaliero-Universitaria di Ferrara                                                                        | Graziella Filippini               | Via Aldo Moro, 8; 44124 Cona, Ferrara                                                                                                   |
| <b>Italy</b>  | Comitato Etico Seconda Università degli Studi di Napoli - Azienda Ospedaliera Universitaria S.U.N. - A.O.R.N. "Ospedali dei Colli". | Liberato Berrino                  | Via L Bianchi snc, 80131 Napoli                                                                                                         |
| <b>Italy</b>  | Comitato Etico Area Vasta Nord Ovest                                                                                                | Romano Danesi                     | c/o Azienda Ospedaliero Universitaria Pisana, Via Roma, 67, 56126 Pisa                                                                  |
| <b>Latvia</b> | Ethics Committee for Clinical Research at Pauls Stradins Clinical University Hospital Development Society                           | Prof Peteris Stradins             | Ethics Committee for Clinical Research at Pauls Stradins Clinical University Hospital Development Society, Pilsonu street 13, Riga 1002 |
| <b>Mexico</b> | Axis Clinicals Latina, S.A de C.V.                                                                                                  | Dr. Germán Novoa Henckel          | Ing. Basilio Romo Anguiano No. 225, Col. Guadalupe Insurgentes CP 07870 Gustavo A. Madero. México, D.F.                                 |
| <b>Mexico</b> | Comité de Ética en Investigación de Mexico Centre for Clinical Research, S.A. de C.V.                                               | Biol. Celia Ovardia               | Amores #709 Col. Del Valle C.P. 03100 DF México                                                                                         |
| <b>Mexico</b> | Comité de Ética en Investigación de Christus Muguerza del Parque S.A de C.V                                                         | Dr. Raúl Envila Fisher            | Dr. Pedro Leal Rodríguez #1802 Col. Centro CP 31000 Chihuahua, Chihuahua México                                                         |
| <b>Mexico</b> | Comité de Ética en Investigación del Centro de Investigación Médico Biológica y Terapia Avanzada S.C.                               | Dr. J. Refugio Castellanos Prieto | Severo Díaz # 27 Col. Arcos de Vallarta CP 44130 Guadalajara, Jalisco México                                                            |
| <b>Mexico</b> | Comité de Ética en Investigación de Mexico Centre for Clinical Research, S.A. de C.V.                                               | Biol. Celia Ovardia               | Amores #709 Col. Del Valle C.P. 03100 DF México                                                                                         |
| <b>Mexico</b> | Comité de Ética en Investigación del Hospital Civil de Guadalajara "Fray Antonio Alcalde"                                           | Dr. Juan Luis Soto Mancilla       | Hospital #278 Col. Centro CP 44280 Guadalajara, Jalisco México                                                                          |
| <b>Mexico</b> | Comité de Ética en Investigación del Instituto de Corazón de Querétaro, S.A. de C.V.                                                | Dr. Mauro Echavarría Pinto        | Prolongación Privada Ignacio Zaragoza #16 B 2º piso, Col. Centro C.P. 76000 Querétaro, Querétaro México.                                |



**TRIBUTE \_ IECs/IRBs**

| Site Country          | Ethics Committee                                                                                                                                                                            | Chairperson                          | Address                                                                                                                                         |
|-----------------------|---------------------------------------------------------------------------------------------------------------------------------------------------------------------------------------------|--------------------------------------|-------------------------------------------------------------------------------------------------------------------------------------------------|
| <b>Mexico</b>         | Comité de Ética en Investigación del Instituto Jalisciense de Investigación Clínica, S.A. de C.V. "IJICSA"                                                                                  | Dra. María Gabriela Avelar Bribiesca | Penitenciaria #20 Col. Centro C.P. 44100 Guadalajara, Jalisco México                                                                            |
| <b>Mexico</b>         | Comite de Ética en Investigación del Hospital General del Estado de Sonora "Dr. Ernesto Ramos Bours"/ Comité de Investigación del Instituto Jalisciense de Investigación Clínica S.A de C.V | Dr. Fernando Herrera Fernández       | Boulevard Luis Encinas Johnson s/n Col. Centro CP 83000 Hermosillo, Sonora / Penitenciaria #20 Col. Centro CP 44100 Guadalajara, Jalisco México |
| <b>Mexico</b>         | Comité de Ética en Investigación del Instituto Jalisciense de Investigación Clínica S.A de C.V                                                                                              | Dra. María Gabriela Avelar Bribiesca | Penitenciaria #20 Col. Centro CP 44100 Guadalajara, Jalisco México                                                                              |
| <b>Mexico</b>         | Comité de Ética en Investigación del Hospital Universitario "Dr. José Eleuterio González"                                                                                                   | Dr. José Gerardo Garza Leal          | Avenida Francisco I. Madero y Av. Gonzalitos S/N, Colonia Mitras Centro Monterrey, Nuevo León C.P. 64460 México                                 |
| <b>Mexico</b>         | Comité de Ética en Investigación, de Investigación Biomédica para el desarrollo de fármacos S.A de C.V. "CEiBiomed"                                                                         | MGS Blanca Ivette Venegas López      | Calzada Club Atlas Sur, No. 16 Col. Country Club, El Salto Jalisco C.P. 45680, México.                                                          |
| <b>Mexico</b>         | Comité de Ética en Investigación de Oaxaca Site Management Organization SC                                                                                                                  | Dr. Christian Jesús Núñez            | Humboldt #302 Col. Centro CP 68000 Oaxaca, Oaxaca México                                                                                        |
| <b>Mexico</b>         | Comité de Ética en Investigación de Investigación Biomédica para el Desarrollo de Fármacos, S.A. de C.V.                                                                                    | MGS Blanca Ivette Venegas López      | Av. Sebastián Bach#5257 Col. La Estancia Zapopan, Jalisco                                                                                       |
| <b>Norway</b>         | Regionale Komiteer for Medisinsk og Helsefaglig Forskningsetikk                                                                                                                             | Marit Grønning                       | Universitetet i Bergen, Det medisinske fakultet, P.O. box 7804, 5020 Bergen                                                                     |
| <b>Poland</b>         | Komisja Bioetyczna przy Okregowej Izbie Lekarskiej w Lodzi                                                                                                                                  | prof. Eugeniusz Malafiej, MD, PhD    | ul. Czerwona 3 93-005 Lodz, Poland                                                                                                              |
| <b>Portugal</b>       | CEIC - Comissao de Etica para a Investigacao Clinica                                                                                                                                        | To the attention of the president    | Avenida do Brasil, nº53 - Pav. 17-A; 1749-004 Lisboa                                                                                            |
| <b>Romania</b>        | National Bioethics Committee of Medicines and Medical Devices                                                                                                                               | Prof.Dr.Dinu Antonescu               | Sos. Stefan cel Mare no. 19-21, 020125, District 2, Bucharest                                                                                   |
| <b>United Kingdom</b> | South West - Central Bristol Research Ethics Committee                                                                                                                                      | Dr Pamela Cairns                     | Whitefriars Level 3, Block B Lewin's Mead Bristol BS1 2NT                                                                                       |

## List of IECs/IRBs \_TRINITY

### Argentina

| CEC/LEC                                             | EC Address                                                           | Name of Chairman         |
|-----------------------------------------------------|----------------------------------------------------------------------|--------------------------|
| InAER Research Ethics Committee                     | Arenales 3146 1B, CABA, (C1425BEN), Argentina                        | Dr. Gustavo H. Cerezo    |
| Research Ethics Committee DIM Private Clinic        | Belgrano 136, Ramos Mejía, Pcia. De BsAs., (B1704ETC), Argentina     | Dr. Pedro José Forcada   |
| Clinical Research Ethics Committee (CREC)           | Larrea 1381 3A, CABA (C1117ABK), Argentina                           | Dr. Diego H. Fridman     |
| Clinical Research Ethics Committee (CREC)           | Larrea 1381 3A, CABA (C1117ABK), Argentina                           | Dr. Diego H. Fridman     |
| Ethics Committee CER SALUD Fundación Respirar Salud | Hipolito Yrigoyen 856, Quilmes, Pcia. De BsAs, (B1878FNR), Argentina | Dr. Ariel Saez De Guinoa |
| Clinical Research Ethics Committee (CREC)           | Larrea 1381 3A, CABA (C1117ABK), Argentina                           | Dr. Diego H. Fridman     |

### Belarus

| CEC/LEC                                                                                               | EC Address                                                    | Name of Chairman           |
|-------------------------------------------------------------------------------------------------------|---------------------------------------------------------------|----------------------------|
| Local Ethics Committee of the HEALTHCARE INSTITUTION “Minsk Regional Clinical Hospital”               | Township Lesnoy, 223041                                       | Kotova Anna Igorevna       |
| Ethics Committee of the Gomel Regional Clinical Hospital                                              | 5, Bratyev Lizyukovykh str., Gomel, 246029                    | Kirilenko Sergey Ivanovich |
| Local Independent Ethics Committee Vitebskiy regional hospital                                        | 37, Voinov Internatsionalistov str., 210037, Vitebsk, Belarus | A.P.Zakharov               |
| Local Independent Ethics Committee Emergency City clinical Hospital                                   | 58, Kizhevatova Street, Minsk, Belarus                        | Sirosh Y.A.                |
| Local Ethics Committee of “Republican Research and Practical Centre for Pulmonology and Tuberculosis” | 157, Dolginovsky tr-t                                         | T.M. Kritskaya             |

### Bulgaria

| CEC/LEC                                 | EC Address                                 | Name of Chairman    |
|-----------------------------------------|--------------------------------------------|---------------------|
| Ethics Committee for Multicenter Trials | 5, Sveta Nedelya Sq. 1000, Sofia, Bulgaria | Dr. Alexander Oskar |

## List of IECs/IRBs

### Croatia

| CEC/LEC                       | EC Address                               | Name of Chairman               |
|-------------------------------|------------------------------------------|--------------------------------|
| Središnje etičko povjerenstvo | Ksaverska cesta 4, 10000 Zagreb, Croatia | Prof. Dinko Vitezić, MD<br>PhD |

### Germany

| CEC/LEC                                                                                    | EC Address                                  | Name of Chairman                                                                                         |
|--------------------------------------------------------------------------------------------|---------------------------------------------|----------------------------------------------------------------------------------------------------------|
| Ethik-Kommission des Landes Berlin, Landesamt für<br>gesundheit und Soziales (LaGeSo) -CEC | Fehrbelliner Platz 1, 10707 Berlin, Germany | Chairman: Prof. Dr. med.<br>Martin Hildebrandt,<br>Deputy Chairman: Dr.<br>rer. nat. Benno<br>Rießelmann |

### Hungary

| CEC/LEC                                                                                                                       | EC Address                                                                       | Name of Chairman         |
|-------------------------------------------------------------------------------------------------------------------------------|----------------------------------------------------------------------------------|--------------------------|
| Szegedi Tudományegyetem Szent-Györgyi Albert Klinikai<br>Központ Regionális Humán Orvosbiológiai Kutatásetikai<br>Bizottsága  | I.sz. Belgyógyászati Klinika 6701, Szeged, Korányi fasor 8-10.<br>+36-62-545-997 | Prof. Dr. Wittmann Tibor |
| Intézményi Kutatásetikai Bizottság                                                                                            | 4400 Nyíregyháza, Szent István út 68                                             | Dr. Diószeghy Péter      |
| Etikai Bizottság                                                                                                              | 2045 Törökbálint, Munkácsy M. u. 70                                              | Dr. Czebe Krisztina      |
| Korányi IKEB Pihenő                                                                                                           | út 1. H-1121 Budapest Hungary                                                    | Dr. Valyon Márta         |
| IKEB Karolina Kórház Rendelőintézet                                                                                           | Régi Várház tér 2-4. Mosonmagyaróvár, H-9200 Hungary                             | Dr. Barcsa-Szabó Tibor   |
| Intézményi Kutatásetikai Bizottság                                                                                            | 5004 Szolnok, Tószegi út 21                                                      | Dr. Bakos Noémi          |
| Korányi IKEB                                                                                                                  | Pihenő út 1. H-1121 Budapest Hungary                                             | Dr. Valyon Márta         |
| Borsod-Abaúj-Zemplén Megyei Kórház és Egyetemi Oktató<br>Kórház Regionális, Intézményi Tudományos Kutatásetikai<br>Bizottsága | 3526 Miskolc, Szentpéteri kapu 72-76                                             | Dr. Attila Valikovics    |
| Létamed Intézményi Kutatás Etikai Bizottság                                                                                   | 4281 Létavértes Baross u. 7.                                                     | Prof. Dr. Zoltan Hajdu   |
| Uzsoki utcai Kórház Intézményi Kutatásetikai Bizottsága                                                                       | 1145 Budapest Uzsoki u. 29-41.                                                   | Dr Tibor Milibák         |
| Országos Korányi TBC és Pulmonológiai Intézet<br>Intézményi Kutatás Etikai Bizottság                                          | 1121 Budapest, Pihenő út 1.                                                      | : Dr. Márta Valyon       |

## List of IECs/IRBs

### Italy

| CEC/LEC                                                                                             | EC Address                                                                                           | Name of Chairman   |
|-----------------------------------------------------------------------------------------------------|------------------------------------------------------------------------------------------------------|--------------------|
| COMITATO ETICO AREA A MILANO<br>c/o Segreteria del Comitato Etico Azienda Ospedaliera L. Sacco      | Via G.B. Grassi, 74<br>20157 MILANO                                                                  | Emilio Trabucchi   |
| COMITATO ETICO<br>Aziende Sanitarie Umbria<br>Segreteria Scientifico-Amministrativa                 | Via della Rivoluzione, 16<br>06070 ELLERA di CORCIANO (PG)                                           | Giancarlo Agnelli  |
| COMITATO ETICO REGIONALE<br>Friuli Venezia Giulia<br>c/o Azienda Ospedaliero Universitaria di Udine | Via Colugna, 50<br>33100 UDINE                                                                       | Cesare Campello    |
| COMITATO ETICO<br>per la provincia di MONZA e BRIANZA<br>c/o Ufficio Sperimentazioni Cliniche       | Villa Serena – III piano<br>Azienda Ospedaliera San Gerardo<br>Via Pergolesi, 33<br>20900 MONZA (MI) | Vittorio Locatelli |

### Mexico

| CEC/LEC                                               | EC Address                                                                                                                             | Name of Chairman                           |
|-------------------------------------------------------|----------------------------------------------------------------------------------------------------------------------------------------|--------------------------------------------|
| Comité de Ética en Invesitgación, Frupo Médico Camino | Av. Cuauhtemoc No. 1252, Colonia Santa Cruz Atoyac, Delegación Benito Juárez, México DF, ZC. 03310, México,                            | Dr. Francisco Camilo de la Fuente Sandoval |
| Comité Institucional de Etica e Investigacion CRI     | Boulevard Manuel Ávila Camacho 1994-402 & 1103, San Lucas Tepetlaco, Estado de México, ZC 54055, México                                | Oscar Adrian Valdez Gascon                 |
| Comité de Etica en Investigacion                      | Hospital No. 278 Colonia Alcalde Barranquitas, Sector Hidalgo, Guadalajara Jalisco, ZC 44280, México                                   | Dr. Juan Luis Soto Mancilla                |
| Comité de Etica en Investigacion                      | Trasvina y Retes 1317, Colonia San Felipe Chihuahua Chihuahua, ZC 31203, México                                                        | Roberto I. Contreras Garcia                |
| Comité de Bioetica y Ciencia para la Investigación    | Montiel Numero 87 Piso 1, Consultorio 1, Colonia Tepeyac Insurgentes, Delegación Gustavo A. Madero, Distrito Federal, ZC 07020, México | Dr. Maria Jose Leon Villanueva             |

## List of IECs/IRBs

### Poland

| CEC/LEC                                           | EC Address                                                 | Name of Chairman                         |
|---------------------------------------------------|------------------------------------------------------------|------------------------------------------|
| Bioethics Committee at Medical University in Lodz | Medical University in Lodz, Żeligowskiego 7/9, 90-752 Łódź | Prof. dr hab. n. med.<br>Józef Drzewoski |

### Romania

| CEC/LEC                                                       | EC Address                                                           | Name of Chairman   |
|---------------------------------------------------------------|----------------------------------------------------------------------|--------------------|
| National Bioethics Committee for Medicine and Medical Devices | Sos Stefan cel Mare nr 19-21,<br>020125, sector 2, București, omânia | Dr. Dinu Antonescu |

### Russia

| CEC/LEC                                                                                                                                                                                 | EC Address                                      | Name of Chairman |
|-----------------------------------------------------------------------------------------------------------------------------------------------------------------------------------------|-------------------------------------------------|------------------|
| The Independent Ethics Committee at State-Financed Healthcare Institution "City Clinical Hospital No. 23 n.a. 'Medsantrud" Moscow Health Department                                     | 11, Yauzskaya st., Moscow                       | Chursina T.A.    |
| LEC under Budgetary Healthcare Institution of Voronezh Region "Voronezh City Outpatient Unit # 4"                                                                                       | 24, Generala Lizukova str., Voronezh            | Spepanova L.A.   |
| LEC of the FSBH "Saint-Petersburg Clinical Hospital of RAS"                                                                                                                             | 72, Toreza pr., Saint-Petersburg                | Petrova O.Yu     |
| Local Ethics Committee of Federal state official institution "General military clinical hospital named after academician N.N.Burdenko" of Ministry of Defense of the Russian Federation | 3, Gospitalnaya sq., Moscow                     | Chernov S.A.     |
| Local Ethics Committee Saint-Petersburg State Budgetary Healthcare Institution Ambulatoria Mariinskaya                                                                                  | 6, Isaakievskaya sq., Saint-Petersburg          | Stroiteleva I.V. |
| Local Ethics Committee at LLC Institut Meditsinskikh Issledovaniy (Medical Research Insitute)                                                                                           | 25, lt. A, Koli Tomchaka str., Saint-Petersburg | Uhno M.R.        |
| The Local Ethics Committee Outpatient clinic no. 94 of Nevskiy District, Saint Petersburg                                                                                               | lt. A, 24, Tovarishesky pr., Saint-Petersburg   | Kapushova I.A.   |

## List of IECs/IRBs

Russia (continued)

| CEC/LEC                                                                                                                                                                                                | EC Address                                              | Name of Chairman     |
|--------------------------------------------------------------------------------------------------------------------------------------------------------------------------------------------------------|---------------------------------------------------------|----------------------|
| Local Ethics Committee<br>Saint-Petersburg State Healthcare Institution<br>"Consultative and diagnostic centre # 85"                                                                                   | 89/3, Veteranov pr., Saint-Petersburg                   | Malishev M.L.        |
| LEC of the FBIS KRIEM of Rospotrebnadzor                                                                                                                                                               | 67, Bolshaja Krasnaja str., Kazan                       | S.V.Andreev          |
| Local Independent Ethics Committee at the Municipal State<br>Care Institution (MBUZ) the Gatchina Central District<br>Clinical Hospital                                                                | 15/1, Rosthinskaya str., Gatchina                       | Kuz'ko V.I.          |
| Local Ethics Committee<br>"Clinical Hospital of Saint Luca"                                                                                                                                            | 46, Chugunnaya str., Saint-Petersburg                   | Prof. O.N. Skryabin  |
| Local Independent Ethics Committee of Clinical Hospital<br>122 named under L.G.Sokolov                                                                                                                 | 4, Prospekt Kultury, Saint-Petersburg                   | Panov V.A.           |
| Scientific Research Ethics Committee of the GBOU DPO<br>(State-Financed Educational Institution of<br>Continuing Professional Education), RMAPO (Russian<br>Medical Academy of Postgraduate Education) | 2/1 Barrikadnaya str., Moscow                           | Prof. Sychev D.A.,   |
| Local Ethics Committee at the Alliance Biomedical - Russian<br>Group LLC                                                                                                                               | 126 Griboedov Channel, Saint-Petersburg, Russia, 190068 | Novikova L.N.        |
| Local Ethics Committee ANO "Medical Centre XXI vek"                                                                                                                                                    | 45, Bolshoy Sampsonievsky pr., Saint-Petersburg         | Lysenko N.B.         |
| Local Ethics Committee of State Educational Institution of<br>High Professional Education First Moscow State Medical<br>University n.a. Sechenov                                                       | 8/2 Trubetskaya street, Moscow 119991, Russia           | Prof. D.A. Balalykin |
| The Local Ethic Committee at Kazan State Federal<br>University.                                                                                                                                        | 49, Butlerova str., Kazan                               | Guryleva M.E.        |
| Ethics Committee LLC "International clinic MEDEM"                                                                                                                                                      | 6, Marata str., Saint-Petersburg                        | Karnasevich Yu.A.    |
| Local Ethics Committee<br>Of Pavlov First Saint Petersburg State<br>Medical University                                                                                                                 | 4, Lasarenyi per., Saint-Petersburg                     | Zvartau E.E.         |
| LEC of Nonstate Healthcare Institution "Scientific clinical<br>center of "Scientific clinical center of Public Limited<br>Company "Russian Railways"                                                   | 4, Volokolamskoe highway, 125367, Moscow                | Popov V.V.           |

## List of IECs/IRBs

Russia (continued)

| CEC/LEC                                                                                                                                                                                           | EC Address                                      | Name of Chairman |
|---------------------------------------------------------------------------------------------------------------------------------------------------------------------------------------------------|-------------------------------------------------|------------------|
| State Educational institute of High Professional Education "First Saint-Petersburg State Medical University n.a.ac Pavlov I.P."<br>To chair of the Local Ethics Committee<br>To Professor Zvartau | 12, Rentgena str., Saint-Petersburg             | Zvartau E.E.     |
| Local Ethics Committee<br>of SBHI of Leningrad reigion «Centre of Occupational Pathology»                                                                                                         | Lit O, 27, Mechnikova pr., Saint-Petersburg     | Balunov V.D.     |
| Local Ethics Committee of Reavita Multi-speciality medical centre                                                                                                                                 | 1, Severny pr., Saint-Petersburg                | Vasil'yev M.Yu.  |
| Local Ethics Committee<br>Of Pavlov First Saint Petersburg State Medical University                                                                                                               | 1 bld., 6/8 Lva Tolstogo st., Saint-Petersburg  | Zvartau E.E.     |
| Local Ethics Committee<br>"SBHI of Nizhny Novgorod Region City Clinical Hospital #13 of Avtozavodskoy District of Nizhny Novgorod City"                                                           | 51, Patriotov str., Nizhny Novgorod             | Lebedev V.V.     |
| The Independent Ethics Committee<br>of the Moscow State-financed Health Institution "11th Municipal Clinical Hospital of the Moscow Healthcare Department"                                        | 6 Dvintsev str., Moscow                         | E. I. Shmelev    |
| Independent Ethics Committee of LLC "OrKli" Hospital                                                                                                                                              | 48/27, Sredniy pr. V.O., Saint-Petersburg       | L.B. Dukhanina   |
| LOCAL ETHICS COMMITTEE<br>at the GBUZ (State-Financed Institution of Healthcare),<br>City Hospital no.26                                                                                          | 2, Kostyushko str., Saint-Petersburg            | Zhidkov K.P.     |
| Local Ethics Committee at LLC Institut Meditsinskikh Issledovaniy (Medical Research Insitute)                                                                                                     | 25, lt. A, Koli Tomchaka str., Saint-Petersburg | Uhno M.R.        |
| Independent Local Ethics Committee of<br>State Educational Institution of Higher Professional Education<br>Rostov State Medical University<br>Of Ministry of Health of Russian Federation         | 29, Nakhichevanskiy per., Rostov-on-Don         | Shatokhin Yu.V.  |

## List of IECs/IRBs

Russia (continued)

| CEC/LEC                                                                                                                                                                                            | EC Address                                                  | Name of Chairman |
|----------------------------------------------------------------------------------------------------------------------------------------------------------------------------------------------------|-------------------------------------------------------------|------------------|
| Local Ethics Committee<br>Of Pavlov First Saint Petersburg State<br>Medical University                                                                                                             | 6-8, Tolstoy str. , Saint-Petersburg                        | Zvartau E.E.     |
| Local Ethics Committee of SPb SBHI "City Hospital of<br>Matyr Elizaveta"                                                                                                                           | Lit A, 14, Vavilovyh str., Saint-Petersburg                 | A.A.Naydenov     |
| Ethics Committee at the FGBUZ, Northern Medical Centre<br>named after N.A. Semashko of the Federal Medical and<br>Biological Agency (FMBA) of Russia                                               | 115, Troickiy pr., Arkhangelsk                              | Istomina N.A.    |
| Ethics committee at the Federal State-Funded Institution<br>Federal Clinical research Center for Specialized Medical<br>Care and Medical Technologies of Federal Biomedical<br>Agency              | 28 Orekhovy bulvar, Moscow                                  | Merrkulova I.A.  |
| Local Ethics Committee State Budgetary Healthcare<br>Institution Nizhny Novgorod Regional<br>Clinical Hospital n.a. Semashko                                                                       | 190, Rodionova str., Nizhny Nivgorod                        | Borovkov N.N.    |
| The scientific studies ethics committee of the "International<br>Medical center "SOGAZ" LLC                                                                                                        | 8A, Malaya konushennaya str., Saint-Petersburg              | Akulin I.M.      |
| State-Financed Educational Institution of Higher Vocational<br>Training of the MoH of Russian Federation Ethics<br>Committee                                                                       | 4 Sedina Street, Krasnodar                                  | Bolotova Ye.V.   |
| The Ethics Committee at<br>SBHI of Moscow "City Polyclinic No 210 of Moscow<br>Department of Health"                                                                                               | Bld. 1, 57, Kashirskoe Highway, Moscow                      | Utochkina I.M    |
| Independent Ethics Committee (IEC)<br>Of the MBHI "M. A. Podgorbunsky CCH No. 3"                                                                                                                   | N. Ostrovskogo ul. 22, Kemerovo, 650000                     | Sudakova L.V.    |
| Ethics Committee<br>Of The State-Financed Educational Institution<br>Of Higher Vocational Education<br>North Ossetian State Medical Academy<br>Of The Ministry Of Health Of The Russian Federation | 40, Pushkinskaya street, Vladikavkaz, 362019                | Tsogoyev A.S.    |
| Local Ethics Committee of the Leningrad Region State<br>Budgetary Healthcare Institution "I.N.Yudchenko<br>Lomonosovskaya Interdistrict Hospital"                                                  | 13 Yeleninskaya street, Lomonosov, Leningrad Region, 198412 | Yu. V. Pavlov    |



## List of IECs/IRBs

Russia (continued)

| CEC/LEC                                                                                                                                                                                                                                                                     | EC Address                                                           | Name of Chairman    |
|-----------------------------------------------------------------------------------------------------------------------------------------------------------------------------------------------------------------------------------------------------------------------------|----------------------------------------------------------------------|---------------------|
| Local Ethics Committee<br>Regional State Budgetary Healthcare Institution City<br>Hospital                                                                                                                                                                                  | 75, Zmeinogorsky trakt, Barnaul, 656045                              | Kovchina S.V.       |
| Local Ethics Committee under the SPb SBHI "City multi-<br>field hospital" #2                                                                                                                                                                                                | 5 Ushebny pereulok, Saint-Petersburg                                 | Nesterenko A.O.     |
| United Local Ethic Committee of Municipal Budgetary<br>Institution of Healthcare "Kemerovo Craniological<br>Dispensary" and FGBU Scientific Research Institute of<br>Complex Issues of Cardiovascular Diseases of Siberian<br>Branch of Russian Academy of Medical Sciences | 6, Sosnovyi boul, Kemerovo, 650002                                   | Prof. Grigoriev E.B |
| Ethics Committee of Yaroslavl Regional Clinical Hospital                                                                                                                                                                                                                    | 7 Yakovlevskaya street, Yaroslavl, 150062                            | Butina E. Yu        |
| Local Ethics Committee of SBHI HPE USMU of the MoH<br>of Russia                                                                                                                                                                                                             | 3, Repina str., Ekatherinburg, 6200028                               | O.G. Smolenskaya    |
| LIEC of State-Financed Healthcare Institution, Chelyabinsk<br>Regional Clinical Hospital                                                                                                                                                                                    | 70, Vorovskogo street, Chelyabinsk, 454076                           | Kuz'min V.N.        |
| LEC of Saint-Petersburg State Budget Healthcare Institution<br>"Pokrovskaya City Hospital"                                                                                                                                                                                  | 85, Bolshoy prospect., Vasilievskii island, Saint-Petersburg, 199106 | Balyabyn A.A.       |
| LEC "Reafan" LLC                                                                                                                                                                                                                                                            | 14, Yadrintsevskaya Str., Novosibirsk                                | Bespalov A.G.       |
| Intercollegiate Ethics Committee                                                                                                                                                                                                                                            | 119002, g. Moskva, per. Gagarinsky, d. 37, str. 2                    | Vol'skaya Ye.A.     |
| Local Ethic Committee of the State Budget Educational<br>Institution of High Professional Education<br>"Ryazan State Medical University n.a. Academician<br>I.P.Pavlov" of the MoH of the Russian Federation                                                                | 9 Vysokovolt'naya str., Ryazan, Russia, 390026                       | Yakusheva E.N.      |
| Ethics Committee of the FSPbSMU n. a. Academician I.P.<br>Pavlov                                                                                                                                                                                                            | 10 Rentgena St., Saint Petersburg                                    | E.E. Zvartau        |
| Local Ethics committee of SBEI HPE Saratov State Medical<br>Uneversity named after V.I. Razumovsky of the Ministry<br>of Healthcare of the Russian Federation                                                                                                               | 137, Bolshaya<br>Sadovaya Str., 410053, Saratov, Russia.             | Naumova E.A.        |
| Interuniversity Ethics Committee                                                                                                                                                                                                                                            | 119002 Moscow, 37 bld. 2, Gagarinskiy Per.                           | Volskaya E.A        |

## TRINITY List of IECs/IRBs

### Slovakia

| CEC/LEC                                         | EC Address                              | Name of Chairman                |
|-------------------------------------------------|-----------------------------------------|---------------------------------|
| Eticka komisia NsP sv.Lukas Galanta, a.s.       | Hodska 373/38, 924 22 Galanta           | Richard Klucka, MD              |
| Etická komisia Kosického samosprávneho kraja    | Námestie Maratonu mieru 1, 04266 Kosice | Martina Kudlacova, MD           |
| OKBsHTU, NsP n.o. Kráľovský Chlmec              | Nemocnicna 8, 077 01 Kralovsky Chlmec   | Martina Kudlacova, MD           |
| Eticka komisia Presovskeho samospravneho kraja  | Namestie mieru 2, 080 01 Presov         | Julius Zbynovsky, MD, MPH       |
| Ethics Committee NsP sv. Jakuba n.o., Bardejov  | Namestie mieru 2, 080 01 Presov         | Julius Zbynovsky, MD, MPH       |
| Eticka komisia Nitrianskeho samospravneho kraja | Razusova 2A, 949 01 Nitra               | ass.prof. Tibor Duris, MD, CSc. |
| Eticka komisia Presovskeho samospravneho kraja  | Namestie mieru 2, 080 01 Presov         | Julius Zbynovsky, MD, MPH       |

### Turkey

| CEC/LEC                                                                                                                                                                                     | EC Address                                                      | Name of Chairman    |
|---------------------------------------------------------------------------------------------------------------------------------------------------------------------------------------------|-----------------------------------------------------------------|---------------------|
| Mersin Universitesi Klinik Arastirmalar Etik Kurulu Mersin Univeritesi Saglik Arastirma ve Uygulama Hastanesi Ihsaniye Mah. 4903 Sokak No:3 Necdet Ulger Binasi 3. Kat 33079 Mersin Turkiye | 4903 Sokak No:3 Necdet Ulger Binasi 3. Kat 33079 Mersin Turkiye | Prof. Bahar Tunçtan |

### United Kingdom

| CEC/LEC                                  | EC Address                                                        | Name of Chairman |
|------------------------------------------|-------------------------------------------------------------------|------------------|
| NRES Committee East Midlands – Leicester | The Old Chapel, Royal Standard Place<br>Nottingham, NG1 6FS<br>UK | Dickens Geogg    |

## TRINITY List of IECs/IRBs

### Ukraine

| CEC/LEC                                                                                                                                                                           | EC Address                                       | Name of Chairman |
|-----------------------------------------------------------------------------------------------------------------------------------------------------------------------------------|--------------------------------------------------|------------------|
| Ethics Committee at the Lviv Regional Clinical Hospital                                                                                                                           | 7 Chernigivska Street, 79010, Lviv               | Zakaliuzhnyi I.  |
| Ethics Committee of Municipal healthcare facility "Kharkiv City Clinical Hospital No. 13"                                                                                         | 137, Gagarina Ave., 61124 Kharkiv                | Solodka O.V.     |
| Ethics Committee of Central District Polyclinic of the Pecherskyi District                                                                                                        | 13, Podvisotskogo Str. Kyiv                      | P. Yaroshevskiy  |
| Ethics Committee of Luhansk City Multidiscipline Hospital 7                                                                                                                       | 1 Sheremeta Str., Luhansk, 91055, Ukraine.       | Kotov V.P.       |
| Ethics Committee of Lviv Regional Clinical Diagnostic Centre                                                                                                                      | 69 Pekarska Str., 79010, Lviv                    | Pukaliak R.      |
| Ethics Committee of the State Institution "National Institute of Phthiology and Pulmonology named after F. H. Yanovskyi under the National Academy of Medical Sciences of Ukraine | 10, M.Amosova Str., Kyiv, 03680, Ukraine         | Melnyk V. M.     |
| Ethics Committee of Municipal Institution "Central Hospital of Ordzhonikidzevskiy District"                                                                                       | 25, Shevchenko blvd., Zaporizhzhya 69001 Ukraine | Patalakh O.      |
| Ethics Committee of the State Institution "National Institute of Phthiology and Pulmonology named after F. H. Yanovskyi under the National Academy of Medical Sciences of Ukraine | 10, M.Amosova Str., Kyiv, 03680, Ukraine         | Melnyk V. M.     |
| Ethics Committee of Municipal Institution of Health "Kharkiv City Clinical Emergency Hospital named after prof. O.I.Meshchaninov"                                                 | 3a, Balakireva lane, Kharkiv, 61103, Ukraine     | V. Grebeniuk     |
| Ethics Committee of the State Institution "National Institute of Phthiology and Pulmonology named after F. H. Yanovskyi under the National Academy of Medical Sciences of Ukraine | 10, M.Amosova Str., Kyiv, 03680, Ukraine         | Melnyk V. M.     |
| Ethics Committee of Donentsk National Medical University n.a. Maksym Horkyyi                                                                                                      | 43A, Dzerzhynskogo str., Donetsk, Ukraine        | Statinova O.     |
| Ethics Committee of Vinnytsia Regional Clinical Hospital for Great Patriotic War Invalides                                                                                        | 109A Pyrogoва Str., Vinnytsia, 21018, Ukraine..  | V. Dzhygaliuk    |
| Ethics Committee of the First City Clinical Hospital                                                                                                                              | 23, Shevchenko Str., Poltava, 36024, Ukraine     | L. Selikhova     |

## TRINITY List of IECs/IRBs

Ukraine (continued)

| CEC/LEC                                                                                                                                                               | EC Address                                                | Name of Chairman |
|-----------------------------------------------------------------------------------------------------------------------------------------------------------------------|-----------------------------------------------------------|------------------|
| Ethics Committee of Municipal Institution “Dnipropetrovsk City Clinical Hospital No. 2” of the Dnipropetrovsk Regional Council                                        | 53 Kalinina Avenue, Dnipropetrovsk, 49064, Ukraine        | Leshchev D.P.    |
| Ethics Committee of State Institution "Institute of Gerontology named after D.F. Chebotarev of National Academy of Medical Sciences of Ukraine                        | 67, Vyshgorodska Str., Kyiv, 04114, Ukraine               | Bachynska N.     |
| Ethics Committee of Medical and Sanitary Part of Public Share society "Kharkiv Tractor Plant named after S. Ordzhonikidze "                                           | 275, Moskovskiy Ave., Kharkiv, 61106, Ukraine             | A. Serik         |
| Ethics Committee of Regional Municipal Institution "Chernivtsi Regional Clinical Hospital"                                                                            | 137, Golovna, Str., Chernivtsi, 58002, Ukraine.           | B.P.Sytenko      |
| Municipal non-commercial Institution "Consultative and diagnostic center” of the Desnianskyi District in Kyiv                                                         | 81/1, Zakrevskiy str., ,02232, Kyiv, Ukraine              | A. Zaizzhena     |
| Ethics Committee of Municipal medical and preventive institution "Donetsk Regional Clinical Territorial Medical Union                                                 | 14, Illicha Str., 83099, Donetsk, Ukraine                 | Sagalevich A. I. |
| preventive institution "Donetsk Regional Clinical Territorial Medical Union                                                                                           | 34, Timiryazev Str., Vinnytsya, 21001, Ukraine            | I. Tomashkevych  |
| Local Bioethics Committee of Regional Phthisiopulmonology Center of Ivano-Frankivsk1                                                                                  | 114, Getmana Mazepy Str., Ivano-Frankivsk, 76018, Ukraine | O. Tsikhon       |
| Medical Ethics Committee of Public Institution “Ukrainian State Research Institute of Medical and Social Problems of Disability of the Ministry of Health of Ukraine” | 17 Franka Street, Ivano-Frankivsk, 76018, Ukraine         | Koniuska M.      |
| Local Ethics Committee of Municipal facility "Dnipropetrovsk 6th City Clinical Hospital at the Dnipropetrovsk Regional Rada"                                          | 1a Radianskyy lane, Dnipropetrovsk, 49027, Ukraine        | Korobkin Yu.I.   |
|                                                                                                                                                                       | 13 Batumska Str., Dnipropetrovsk, 49074, Ukraine.         | M.P.Morenets     |

## TRINITY List of IECs/IRBs

Ukraine (Continued)

| CEC/LEC                                                                                                                                                                           | EC Address                                           | Name of Chairman |
|-----------------------------------------------------------------------------------------------------------------------------------------------------------------------------------|------------------------------------------------------|------------------|
| Ethics Committee of the State Institution “National Institute of Phthiology and Pulmonology named after F. H. Yanovskyi under the National Academy of Medical Sciences of Ukraine | 10, M.Amosova Str., Kyiv, 03680, Ukraine             | Melnyk V. M.     |
| Ethics Committee of Municipal Institution "Dnipropetrovsk City Multidiscipline Clinical Hospital #4" of Dnipropetrovsk Regional Rada                                              | 31, Blyzhnia Str., Dnipropetrovsk, 49102, Ukraine    | Shynkarenko M.   |
| Ethics Commission of Chernihiv City Hospital No.2 of Chernihiv, Borough Council                                                                                                   | 168, 1 May Str., Chernigiv, 17034, Ukraine           | Rubachuk E.P.    |
| Ethics Committee of Scientific and Research Institute of Invalid Rehabilitation on base of Pirogov National Medical University                                                    | 104, Khmelnytskiy highway, Vinnytsya, 21030, Ukraine | Dovhaliuk T.     |
| Ethics Committee at Municipal Institution "Odesa Regional Clinical Hospital"                                                                                                      | 26, Zabolotnogo str., Odesa, 65025, Ukraine          | Baiazitov M.R.   |
| Ethics Committee of Municipal therapeutic and preventive institution "Central City Clinical Hospital No.1 of Donetsk City"                                                        | 52A, R. Luxemburg Str., Donetsk, 83114, Ukraine      | Mierkuriev V.    |
| Ethics Committee of Center of Reconstructive and Rehabilitative Medicine.- (University Clinic) of the Odesa National Medical University                                           | 8, Tinysta str., Odesa 65009 Ukraine                 | Koshyk D.A.      |
| Ethics Committee at Municipal therapeutic and preventive institution "Regional clinical hospital of occupational diseases"                                                        | 104 Illicha Ave., Donetsk, 83003, Ukraine            | Kaniuka S.       |
| Ethics Committee at State Institution “Divisional Clinical Hospital of Uzhgorod Hospital of Uzhgorod station” of State Territorial Branch Unit “Lviv Railway                      | 71 Mynaiska Street, 88009, Uzhgorod                  | V. Kanchii       |
| Ethics Committee of Poltava Regional Clinical Hospital named after M.V.Sklifosovsky                                                                                               | 23 Shevchenko Street, Poltava 36011, Ukraine         | Kolomoiets I.    |
| Ethics Committee of Municipal Institution "City Hospital #7                                                                                                                       | 9, Lunacharsky str., 69118, Zaporizhzhya             | Lyutyh J.        |
| Ethics Committee of Municipal Institution Dnipropetrovsk City Clinical Association Clinical Emergency Hospital of Dnipropetrovsk Regional Rada                                    | 26, Schmidta str., Dnipropetrovsk, 49006, Ukraine    | Mel'hyna L.I.    |

## TRINITY List of IECs/IRBs

Ukraine (continued)

| CEC/LEC                                                                                                                                                | EC Address                                             | Name of Chairman |
|--------------------------------------------------------------------------------------------------------------------------------------------------------|--------------------------------------------------------|------------------|
| Local Ethics Committee of Educational-scientific medical complex "University Hospital" of Kharkiv National Medical University                          | 4, Tekstylna str., Kharkiv, 61157, Ukraine             | Korostii V.I.    |
| Ethics Committee at the municipal facility “6-th City Clinical Hospital” of Zaporizhia City Council                                                    | 34 Stalevariv St., Zaporizhia, 69035                   | Gryvtsova O. Ye. |
| Ethics Committee at the municipal healthcare facility                                                                                                  | 13 Pravdy Ave., Kharkiv, 61058                         | V.A.Yarosh       |
| Ethics Committee at the Municipal Institution of Sumy Regional Council "Sumy Regional Clinical Hospital"                                               | 48, Troitskaya str., Sumy, 40018, Ukraine              | Savenko I.I.     |
| Ethics Committee at the Vinnytsia Regional Clinical Hospital named after M. I. Pyrohov                                                                 | 46 Pyrogova Str., Vinnytsia, 21018, Ukraine            | V.O. Myroniuk    |
| Ethics Commission at the Kremenchuk First City Hospital n.a. O.T.Bohaievsky                                                                            | 60/1 40 rokiv Zhovtnia St., Kremenchuk, Poltava region | Kuznetsova O.V.  |
| Ethics Committee of Municipal Institution “Cherkasy Regional Hospital of the Cherkasy Regional Council”                                                | 3, Mendeleieva Str., Cherkasy, 18009, Ukraine          | T.S. Bilonhova   |
| Ethics Committee of MHI “RCH CEMC & DM”                                                                                                                | 13, Pravdy Ave., Kharkiv, 61022, Ukraine               | V.A. Yarosh      |
| Ethics Committee of Municipal Institution "Kherson City Clinical Hospital n.a. Ye.Ye.Karabelesh"                                                       | 22/1, Ushakova Str., 73000, Kharson                    | Hordubei Ye.Ye.  |
| Medical Ethics Committee of State Institution “National Research Centre for Radiation Medicine” of the National Academy of Medical Sciences of Ukraine | 53 Melnikov street, Kyiv, 04050                        | D.O. Bilyi       |
| Ethics Committee of Municipal Institution "Zaporizhzhya Regional Clinical Hospital" of Zaporizhzhya Regional Rada                                      | 10, Orikhivske shose, Zaporizhzhya, 69600, Ukraine     | Tiahla V.        |
| Ethics Committee at 4th City Clinical Hospital in Poltava                                                                                              | 101, Frunze str., Poltava, 36002, Ukraine              | L. Nemchenko     |

TRILOGY\_IEC/IRBs

| Country        | CEC/LEC                                                                                             | IRB/IEC Address                                                                  | Name of Chairman                        |
|----------------|-----------------------------------------------------------------------------------------------------|----------------------------------------------------------------------------------|-----------------------------------------|
| Argentina      | Comité de Etica en Investigación Clínica (CEIC)                                                     | Larrea 1381 - 3° "A" - CABA - Argentina, +54 11 4826 3962                        | Dr. Miguel J. Mamone/ Dr. Diego Fridman |
|                | CER Salud Eyhics Committee                                                                          | Hipólito Yrigoyen 856, Quilmes, 1878, Buenos Aires, Argentina - +54 11 4224 0046 | Dr. Marcelo Fernandez                   |
|                | Comité de Etica en Investigación Clínica (CEIC)                                                     | Larrea 1381 - 3° "A" - CABA - Argentina, +54 11 4826 3962                        | Dr. Miguel J. Mamone/ Dr. Diego Fridman |
|                | Comite de Bioetica CIMEL                                                                            | Tucuman 1314, B1824KAJ, Lanus, Buenos Aires, Argentina - +54 9 11 4179 0165      | Gamallo, Fabian Augusto                 |
|                | CIRE - Comité Institucional de Revisión y Etica                                                     | Pedro Goyena 551, CABA, 1424, Argentina - + 54 11 4925 6666 ext 124              | Dr. Rodolfo Rey                         |
|                | Comité de Etica en Investigación Clínica (CEIC)                                                     | Larrea 1381 - 3° "A" - CABA - Argentina, +54 11 4826 3962                        | Dr. Miguel J. Mamone/ Dr. Diego Fridman |
|                | Comité de Etica en Investigación Clínica (CEIC)                                                     | Larrea 1381 - 3° "A" - CABA - Argentina, +54 11 4826 3962                        | Dr. Miguel J. Mamone/ Dr. Diego Fridman |
| Belgium        | Universitair Ziekenhuis Antwerpen (UZA) Ethisch Comité                                              | Wilrijkstraat 10, 2650 Edegem, Belgium                                           | Prof. Dr. Patrick Cras                  |
|                | Emmaüs Ethisch Comité                                                                               | Edgard Tinellaan 1c 2800, Mechelen, Belgium                                      | Dr. Jan Vander Sande                    |
|                | Universitair Ziekenhuis Antwerpen (UZA) Ethisch Comité                                              | Wilrijkstraat 10, 2650 Edegem, Belgium                                           | Prof. Dr. Patrick Cras                  |
| Bulgaria       | Ethics committee for medical and scientific research at "City Clinical Cardiology Centre MHAT" EOOD | 1407, Sofia, Bulgaria                                                            | Asen Petrov                             |
|                | Ethics Committee for Multicenter Trials                                                             | 5, Sveta Nedelya Sq. 1000, Sofia, Bulgaria                                       | Alexander Oscar                         |
|                | Ethics committee at MHAT "Lyulin" EAD                                                               | 1336, Sofia, Bulgaria                                                            | Vitan Vlahon                            |
|                | Ethics Committee for Multicenter Trials                                                             | 5, Sveta Nedelya Sq. 1000, Sofia, Bulgaria                                       | Alexander Oscar                         |
|                | Ethics Committee for Multicenter Trials                                                             | 5, Sveta Nedelya Sq. 1000, Sofia, Bulgaria                                       | Alexander Oscar                         |
|                | Ethics Committee for Multicenter Trials                                                             | 5, Sveta Nedelya Sq. 1000, Sofia, Bulgaria                                       | Alexander Oscar                         |
|                | Ethics Committee for Multicenter Trials                                                             | 5, Sveta Nedelya Sq. 1000, Sofia, Bulgaria                                       | Alexander Oscar                         |
|                | Ethics Committee for Multicenter Trials                                                             | 5, Sveta Nedelya Sq. 1000, Sofia, Bulgaria                                       | Alexander Oscar                         |
|                | Ethics Committee for Multicenter Trials                                                             | 5, Sveta Nedelya Sq. 1000, Sofia, Bulgaria                                       | Alexander Oscar                         |
| Czech Republic | Etická komise Fakultní nemocnice v Motole                                                           | V Úvalu 84, 150 06 Praha 5 Tel: +420 224 431 195 / 197                           | MUDr. Vratislav Šmelhaus                |
|                | Etická komise FN u sv. Anny v Brně                                                                  | Pekařská 53, 656 91 Brno Tel: +420 543 184 195                                   | Prof. MUDr. Vladimír Soška, CSc.        |
|                | Etická komise Fakultní nemocnice v Motole                                                           | V Úvalu 84, 150 06 Praha 5 Tel: +420 224 431 195 / 197                           | MUDr. Vratislav Šmelhaus                |
|                | Etická komise Fakultní nemocnice Plzeň                                                              | Edvarda Beneše 13, 305 99 Plzeň Tel: +420 377 423 275                            | Doc. MUDr. Jindřich Fínek, PhD.         |
|                | Etická komise Slezská nemocnice v Opavě, p.o.                                                       | Olomoucká 86, 746 01 Opava Tel: +420 553 766 510                                 | PharmDr.Zajicová Marie                  |
|                | Etická komise Fakultní nemocnice Královské Vinohrady                                                | Šrobárova 1150/50, 100 34 Praha 10 Tel: +420 267 162 272                         | Prof. MUDr. Jan Pachtl, CSc.            |
|                | Etická komise Nemocnice Kyjov, p.o.                                                                 | Strážovská 1247, 697 33 Kyjov Tel: +420 518 601 406                              | Prim. MUDr. Josef Blazek                |
|                | Etická komise Fakultní nemocnice Plzeň                                                              | Edvarda Beneše 13, 305 99 Plzeň Tel: +420 377 423 275                            | Doc. MUDr. Jindřich Fínek, PhD.         |

TRILOGY\_IEC/IRBs

| Country        | CEC/LEC                                                                                                    | IRB/IEC Address                                                        | Name of Chairman                              |
|----------------|------------------------------------------------------------------------------------------------------------|------------------------------------------------------------------------|-----------------------------------------------|
| Czech Republic | Etická komise Nemocnice Na Bulovce                                                                         | Budínova 2, 180 81 Praha 8 Tel: +420 266 082 472                       | prof. MUDr. Michal Holub, PhD.                |
|                | Etická komise Fakultní Nemocnice hradec Králové                                                            | Sokolovská 581, 500 05 Hradec Králové                                  | MUDr. Jiří Vortel                             |
|                | Etická komise Fakultní nemocnice Plzeň                                                                     | Edvarda Beneše 13<br>305 99 Plzeň                                      | E. Benese                                     |
|                | Etická komise Fakultní nemocnice v Motole                                                                  | V Úvalu 84, 150 06 Praha 5 Tel: +420 224 431 195 / 197                 | MUDr. Vratislav Šmelhaus                      |
|                | Etická komise Oblastní nemocnice Příbram, a.s.                                                             | Podbrdská 296, 261 95 Příbram Tel: +420 318 654 490 / +420 775 057 103 | MUDr. Jan Šantora, CSc.                       |
|                | Etická komise Fakultní nemocnice v Motole                                                                  | V Úvalu 84, 150 06 Praha 5 Tel: +420 224 431 195 / 197                 | MUDr. Vratislav Šmelhaus                      |
|                | Etická komise Fakultní nemocnice v Motole                                                                  | V Úvalu 84, 150 06 Praha 5 Tel: +420 224 431 195 / 198                 | MUDr. Vratislav Šmelhaus                      |
|                | Etická komise Nemocnice Mělník                                                                             | Pražská 528, 276 01 Mělník, Czech Republic                             | MUDr. Zdeňka Hradecká                         |
|                | Etická komise Fakultní Nemocnice hradec Králové                                                            | Sokolovská 581, 500 05 Hradec Králové                                  | MUDr. Jiří Vortel                             |
|                | Etická komise Fakultní Nemocnice hradec Králové                                                            | Sokolovská 581, 500 05 Hradec Králové                                  | MUDr. Jiří Vortel                             |
|                | Etická komise FN u sv. Anny v Brně                                                                         | Pekařská 53, 656 91 Brno Tel: +420 543 184 195                         | Prof. MUDr. Vladimír Soška, CSc.              |
|                | Etická komise Fakultní nemocnice v Motole                                                                  | V Úvalu 84, 150 06 Praha 5 Tel: +420 224 431 195 / 197                 | MUDr. Vratislav Šmelhaus                      |
|                | Etická komise Fakultní Nemocnice hradec Králové                                                            | Sokolovská 581, 500 05 Hradec Králové                                  | MUDr. Jiří Vortel                             |
| Germany        | Ethics Commission of the State Chamber of Physicians Brandenburg                                           | Dreifertstraße 12, Ruedersdorf                                         | Prof. Dr. med. Michael Matthias               |
|                | Ethikkommission bei der Sächsischen Landesärztekammer                                                      | Schützenhöhe 16, 01099 Dresden                                         | Prof. Dr. med. habil. Bernd Terhaag           |
|                | Ethikkommission der Bayerischen Landesärztekammer                                                          | Mühlbaurstr. 16, 81677 München                                         | Prof. Dr. Hasford                             |
|                | Ethikkommission der Bayerischen Landesärztekammer                                                          | Mühlbaurstr. 16, 81677 München                                         | Prof. Dr. Hasford                             |
|                | Ethikkommission bei der Sächsischen Landesärztekammer                                                      | Schützenhöhe 16, 01099 Dresden                                         | Chairman: Prof. Dr. med. habil. Bernd Terhaag |
|                | Ethikkommission bei der Sächsischen Landesärztekammer                                                      | Schützenhöhe 16, 01099 Dresden                                         | Chairman: Prof. Dr. med. habil. Bernd Terhaag |
|                | Ethics Committee of the Medical Association of Westphalia-Lippe and the Medical Faculty of the Westphalian | Gartenstraße 210 - 214, 48147 Münster                                  | Prof. Dr. Dr. med. Hans-Werner Bothe          |
|                | Ethikkommission der Bayerischen Landesärztekammer                                                          | Mühlbaurstr. 16, 81677 München                                         | Prof. Dr. Hasford                             |
|                | Ethikkommission bei der Landesärztekammer Rheinland-Pfalz                                                  | Deutschhausplatz 3, 55116 Mainz                                        | Prof. Dr. med. Dipl. Ing. Stephan Letzel      |
|                | Ethikkommission bei der Ärztekammer Niedersachsen                                                          | Berliner Allee 20 , 30175 Hannover                                     | Prof. Dr. med. Peter Kleine                   |
|                | Ethikkommission bei der Sächsischen Landesärztekammer                                                      | Schützenhöhe 16, 01099 Dresden                                         | Chairman: Prof. Dr. med. habil. Bernd Terhaag |
|                | Ethik-Kommission bei der Landesärztekammer Baden-Württemberg                                               | Jahnstraße 40, 70597 Stuttgart                                         | Dr. Petra Knupfer                             |
|                | LaGeSo                                                                                                     | Fehrbelliner Platz 1, 10707 Berlin                                     | Prof. Dr. med. K. Thomas Moesta               |
|                | Ethikkommission der Landesärztekammer Hessen                                                               | Im Vogelsang 3, 60488 Frankfurt am Main                                | Prof. Dr. med. Sebastian Harder.              |



TRILOGY\_IEC/IRBs

| Country                                                                                | CEC/LEC                                                                                                     | IRB/IEC Address                                                                          | Name of Chairman                                                                                       |
|----------------------------------------------------------------------------------------|-------------------------------------------------------------------------------------------------------------|------------------------------------------------------------------------------------------|--------------------------------------------------------------------------------------------------------|
|                                                                                        | Ethikkommission der Landesärztekammer Hessen                                                                | Im Vogelsesgang 3, 60488 Frankfurt am Main                                               | Prof. Dr. med. Sebastian Harder.                                                                       |
|                                                                                        | Ethikkommission der Ärztekammer Nordrhein                                                                   | Tersteegenstr. 9, 40474 Düsseldorf                                                       | Professor Dr. Kurt Racké                                                                               |
|                                                                                        | Ethikkommission bei der Ärztekammer Niedersachsen                                                           | Berliner Allee 20 , 30175 Hannover                                                       | Prof. Dr. med. Peter Kleine                                                                            |
| Hungary                                                                                | Szegedi Tudományegyetem Szent Györgyi Albert Klinikai Központ Regionális Humán Orvosbiológiai Kutatószekai  | I. Sz. Belgyógyászati Klinika H-6701 Szeged, Korányi fasor 8-10. tel/fax: +36-62-545-997 | Prof. Dr. Wittman Lajos                                                                                |
|                                                                                        | Csongrád Megyei Egészségügyi Ellátó Központ Hódmezővásárhely-Makó Kórház                                    | u. 2. H-6900 Hungary                                                                     | Dr. Péley Domokos                                                                                      |
|                                                                                        | Magyar Orvosi Kamara (MOK) Pest Megyei Területi Szervezete Pest Megyei Területi Szervezet Etikai Bizottsága | H-1115 Budapest Frankó utca 26/b fsz 3 0036-1-3224-040                                   | Dr.Losonczy István                                                                                     |
|                                                                                        | Törökbálinti Tüdőgyógyintézet                                                                               | 2045 Törökbálint, Munkácsy Mihály u. 7.                                                  | Dr. Czebe Krisztina                                                                                    |
|                                                                                        | Veszprém Megyei Tüdőgyógyintézet                                                                            | 049/2 hrsz. Farkasgyepű H-8582 Igazgatás                                                 | Dr. Medgyasszay Balázs                                                                                 |
|                                                                                        | Toldy Ferenc Kórház és Rendelőintézet                                                                       | 2700 Cegléd, Törteli út 1-3                                                              | Hánka Levente                                                                                          |
|                                                                                        | BAZ Megyei Kórház és Egyetemi Oktatókórház,II. Rákóczi Ferenc Kórház telephely Intézményi Etikai Bizottság  | 3800 Szikszó, Kassai út 45-49.                                                           | Dr. Valikovics Attila                                                                                  |
|                                                                                        | Létamed Intézményi Kutatás Etikai Bizottság                                                                 | 4281, Létavértes, Baross u. 7.                                                           | Prof. Dr. Hajdu Zoltán                                                                                 |
|                                                                                        | Intézményi Kutatószekai Bizottság                                                                           | 4400 Nyíregyháza, Szent István út 68.                                                    | Dr. Diószeghy Péter                                                                                    |
|                                                                                        | Országos Korányi Tbc és Pulmonológiai Intézet Intézményi Kutatás Etikai Bizottság                           | H-1121 Budapest, Pihenő út 1.                                                            | Dr. Valyon Márta                                                                                       |
|                                                                                        | Albert Schweitzer Kórház Rendelőintézet Etikai Bizottsága                                                   | H- 3000 Hatvan Balassi Bálint u. 16.                                                     | Dr. Kelemen Tibor                                                                                      |
|                                                                                        | Italy                                                                                                       | Comitato Etico Milano Area B                                                             | Fondazione IRCCS Ca' Granda - Ospedale Maggiore Policlinico, Via Francesco Sforza n. 28 - 20122 Milano |
| Comitato Etico Per Parma                                                               |                                                                                                             | Via Gramsi, 14 - 43100 Parma                                                             | Umberto Bertazzoni                                                                                     |
| Comitato Etico Regionale Unico (CERU)                                                  |                                                                                                             | Via Colugna, 50 - 33100 Udine                                                            | Cesare Campello                                                                                        |
| Comitato Etico per la Sperimentazione Clinica (CESC) delle Province di Verona e Rovigo |                                                                                                             | p.le A. Stefani, 1, 37126 Verona                                                         | Roberto Leone                                                                                          |
| Comitato Etico Unico della Provincia di Ferrara                                        |                                                                                                             | Via Aldo Moro, 8 - 44124 Cona, Ferrara                                                   | Graziella Filippini                                                                                    |
| Comitato Etico Interaziendale Milano Area A                                            |                                                                                                             | Via Pio II° n° 3 - 20153 Milano                                                          | Milio Trabucchi                                                                                        |
| Comitato Etico IRST - IRCCS - Area Vasta Romagna (FC)                                  |                                                                                                             | Via Piero Maroncelli, 40 - 47014 - Meldora (FC)                                          | Stefano Cascinu                                                                                        |
| Comitato Etico Università Cattolica del Sacro Cuore - Policlinico A. Gemelli           | Largo A. Gemelli, 8 , 00168, Roma                                                                           | Salvatore Mancuso                                                                        |                                                                                                        |
| Mexico                                                                                 | Comité de Ética en Investigación de Investigación Biomédica para el Desarrollo de Fármacos, S.A de C.V.     | Av. Sebastián Bach n° 5257, Col. La Estancia CP 45030, Zapopan, Jalisco, México          | Blanca Ivette Venegas López                                                                            |
| Poland                                                                                 | Komisja Bioetyki Uniwersytetu Medycznego w Łodzi (CEC)                                                      | Żeligowskiego 7/9, 90-752 Łódź                                                           | Prof. Józef Drzewoski                                                                                  |

TRILOGY\_IEC/IRBs

| Country                                                                                                                          | CEC/LEC                                                                                                                 | IRB/IEC Address                                                                    | Name of Chairman                      |
|----------------------------------------------------------------------------------------------------------------------------------|-------------------------------------------------------------------------------------------------------------------------|------------------------------------------------------------------------------------|---------------------------------------|
| Romania                                                                                                                          | National Bioethics Committee for Medicine and Medical Devices (NBCMMD)                                                  | Sos Stefan cel Mare nr 19-21, 020125, sector 2, Bucharest, Romania                 | Prof Dr Dinu Antonescu                |
| Russia                                                                                                                           | Local Ethics Committee of Ryazan State Medical University                                                               | 9 Vysokovolt'naya str., Ryazan, Russia, 390026                                     | Prof. Abrosimov V.N.                  |
|                                                                                                                                  | Ethics Committee of State Educational Institution of High Professional Education "Moscow State University of            | 20 bld.1, Delegatskaya str., Moscow, Russia, 127473                                | Volskaya E.A                          |
|                                                                                                                                  | Local Ethics committee of Budget Healthcare Institution of Voronezh Region                                              | Voronezh City Polyclinic #4, 24, General Lizukova street, Voronezh, Russia, 394053 | Stepanova L.A.                        |
|                                                                                                                                  | Local Ethics Committee of Federal state official institution "General                                                   | Gospital'naya Sq, 3, Moscow, 105229                                                | Chernov S.A                           |
|                                                                                                                                  | Local Ethics Committee of State Budgetary Educational Institution of Higher Professional Education "Siberian State      | 2, Moskovsky Trakt, Russia, 634050                                                 | Vice Head of LEC - Prof. Zjukova N.G. |
|                                                                                                                                  | Local Ethics Committee Of SHI VRCH #1                                                                                   | Voronezh, 151, Moskovsky pr                                                        | Varikovkyi V.A.                       |
|                                                                                                                                  | Local Ethics Committee of State Budget Institution of Healthcare of Stavropol Region "Pyatigorsk oncologic              | 31, Kalinina pr., 357519, Pyatigorsk, Russia                                       | Zagorodnyh L.V.                       |
|                                                                                                                                  | Local Independent Ethics Committee at SFBI "Scientific Research Institute of Pulmonology at Federal Bio-Medical         | 32, 11th Parkovaya str., 105077, Moscow, Russia                                    | Chernyaev A.L.                        |
|                                                                                                                                  | Local Ethics Committee at Municipal Budget Institution of Healthcare of city of Sochi "City hospital No. 5".            | 145a, Armavirskaya str., Dagomys, Lazarevskiy region, Sochi, 354207, Russia        | Gordon K.V.                           |
|                                                                                                                                  | Local Independent Ethics Committee under the State Budgetary Health Institution of Leningrad Region Gatchina            | 15/1, Rosthinskaya str., Gatchina, 188300                                          | Kuzko V.I.                            |
|                                                                                                                                  | Local Ethics committee of FSBI Scientific Research Institute of Physiology and Fundamental Medicine of the Siberian     | Siberian Branch of RAMS, 4, Timakova Str., 630117, Novosibirsk, Russia             | Alperina E.L.                         |
|                                                                                                                                  | Local Independent Ethics committee at Saint-Petersburg State Budgetary Healthcare Institution "Clinical Hospital of     | 46, lit. A, Chugunnaya str., Saint-Petersburg, 194044, Russia                      | Gorbacheva I.A.                       |
|                                                                                                                                  | Ethics Committee established at the Clinical Hospital No. 122 of the                                                    | 4, Prospekt Kultury, Saint-Petersburg, 194291                                      | P.Yu. Pain                            |
|                                                                                                                                  | Local Ethics Committee at the Alliance Biomedical - Russian Group LLC                                                   | 126 Griboedov Channel, Saint-Petersburg, Russia, 190068                            | Novikova L.N.                         |
|                                                                                                                                  | Local Biomedical Ethics Committee of Altay State Medical University                                                     | 40 Lenina str., Barnaul, Russia, 656038                                            | Prof. M.I. Neimark                    |
|                                                                                                                                  | Ethics Committee at State Budget Institution of Healthcare of Stavropol region "City hospital No. 2 of Pyatigorsk city" | 6, Admiralskogo str., Pyatigorsk, 357538, Russia                                   | Temirov I.E.                          |
|                                                                                                                                  | Ethics Committee at First Saint-Petersburg State Medical University named after I.P.Pavlov                              | I.I. Mechnikov, 41, Kirochnaya street 191015, St. Petersburg Russia                | Prof. Zvartau E.E.                    |
|                                                                                                                                  | Local Ethics committee of State Budgetary Healthcare Institution of Moscow City City Clinical Hospital #29 n.a.         | 2, Gospital'naya sq., 105229, Moscow, Russia                                       | Kuznetsov B.V                         |
|                                                                                                                                  | Local Ethics Committee of the "Reavita" Medical Center LLC                                                              | 18/1, Severny pr., Lit. A, Saint-Petersburg, 194295                                | M.Yu. Vasilyev                        |
|                                                                                                                                  | Ethics Committee at First Saint-Petersburg State Medical University named after I.P.Pavlov                              | I.I. Mechnikov, 41, Kirochnaya street 191015, St. Petersburg Russia                | Prof. Zvartau E.E.                    |
|                                                                                                                                  | Local Ethics committee of State Healthcare Institution Regional Clinical Hospital of Saratov                            | 1, Smirnovskoye Ushchelye, 410053, Saratov, Russia                                 | Fisun A.M.                            |
|                                                                                                                                  | Local Ethics Committee of State Budgetary Institution of Healthcare Chelyabinsk Regional Clinical Hospital              | 70, Vorovskogo str., Chelyabinsk, 454076                                           | V.N. Kuzmin                           |
|                                                                                                                                  | Local Ethics Committee of State Budgetary Healthcare Institution of Nizhny Novgorod Region "City Clinical               | 51, Patriotov str., Nizhny Novgorod, Russia, 603018                                | Kurnikova G.Yu                        |
| Local Ethics committee of State Healthcare Institution of Yaroslavl Region Clinical Hospital #8                                  | 39, Suzdalskoye Shosse, 150030, Yaroslavl, Russia                                                                       | Lileyeva M.A.                                                                      |                                       |
| Ethics Committee of Federal State Budgetary Healthcare Institution "Ural Scientific Research Institution of phthisiopulmonology" | 50, Party congress XXII str., Yekaterinburg, 620039, Russia                                                             | Golubev D.N.                                                                       |                                       |

TRILOGY\_IEC/IRBs

| Country                                                    | CEC/LEC                                                                                                             | IRB/IEC Address                                                     | Name of Chairman            |
|------------------------------------------------------------|---------------------------------------------------------------------------------------------------------------------|---------------------------------------------------------------------|-----------------------------|
|                                                            | Local Ethics committee of SBEl HPE Saratov State Medical Uneversity named after V.I. Razumovsky of the Ministry     | 137, Bolshaya, Sadovaya Str., 410053, Saratov, Russia.              | Kamenskikh T.G.             |
|                                                            | Local Ethics Committee of Medical Research Institute                                                                | 25, Li. A3, Koli Tomchaka str., Saint-Petersburg, Russia, 196084    | Dr Yukhno M.V.              |
|                                                            | Ethics Committeee at First Saint-Petersburg State Medical University named after I.P.Pavlov                         | I.I. Mechnikov, 41, Kirochnaya street 191015, St. Petersburg Russia | Prof. Zvartau E.E.          |
|                                                            | Local Ethic Committee under Elisabeth Hospital                                                                      | 14, Vavilovyh, Saint-Petersburg, 195257, Russia                     | Poliushkin S.V.             |
|                                                            | Local Ethics committee of State Healthcare Institution of Yaroslavl Region "Clinical Hospital #2"                   | 24 Popova str., 150010, Yaroslavl, Russia                           | Fetelego O.I.               |
|                                                            | Interuniversity Ethics Committee                                                                                    | 20/1, Delegatskaya str., Moscow, 127473, Russia                     | Volskaya E.A.               |
| Slovakia                                                   | Eticka komisia KSK                                                                                                  | nam. Maratonu mieru 1, 04266 Kosice                                 | PhDr. Peter Dringuš         |
|                                                            | Eticka komisia KSK                                                                                                  | nam. Maratonu mieru 1, 04266 Kosice                                 | PhDr. Peter Dringuš         |
|                                                            | Eticka komisia FNsp FDR                                                                                             | nam. Ludvika Svobodu 1, 97517 Banska Bystrica                       | Čupková K.                  |
|                                                            | Eticka komisia KSK                                                                                                  | nam. Maratonu mieru 1, 04266 Kosice                                 | PhDr. Peter Dringuš         |
|                                                            | Eticka komisia TSK                                                                                                  | K dolnej stanici 7282/20A, 91101 Trencin                            | Jan Bielik                  |
| UK                                                         | NRES Committee North West - GM South North West Centre of Research Ethics Committees                                | Barlow House, 3rd Floor, 4 Minshull Street, Manchester, M1 3DZ      | Professor Sobhan Vinjamuri  |
| Ukraine                                                    | Local Ethics Committee of Municipal health facility "Kharkiv City Clinical Hospital №27                             | 41, Pushkinska Str., Kharkiv, 61176, Ukraine                        | Borzova Elena               |
|                                                            | Local Ethics Committee of Utility 5 City Clinical Hospital                                                          | 22, Konovaltsya Street, Lviv, 79013, Ukraine                        | Kindrat Volodymyrovych Basa |
|                                                            | State Institution "Divisional Clinical Hospital of Uzhorod station" of State Territorial Branch Unit "Lviv Railway" | 71 Mynaiska Street, 88009, Uzhgorod, Ukraine                        | V.M. Kanchiy                |
|                                                            | Ethics Committee at City Clinical Hospital No. 1 in Vinnytsia                                                       | 96, Khmelnitske shose, 21029, Vinnytsya, Ukraine                    | Turskyi O. F.               |
|                                                            | Ethics Committee of Municipal Institution "Zaporizhzhya Regional                                                    | 10, Orihivske shosse, Zaporizhzhya, 69600, Ukraine                  | Victoria Tiahla             |
|                                                            | Ethics Committee at the State Institution "Researc                                                                  | 10, Velykokamjana Str., Uzhgorod, 88000, Ukraine                    | Kyrtych L. P                |
|                                                            | Ethics Committee at the Municipal Institution "Kryvyi Rih City Clinical Hospital No. 8"                             | 55, 23rd-Lyutogo str., Kryvyi Rig, 50047, Ukraine                   | Melnychenko V.              |
|                                                            | Ethics Committee of City Hospital No. 1                                                                             | 4, Volodarskoho str., 54003 Mykolayiv, Ukraine                      | Mirian T. I.                |
|                                                            | Local Bioethics Committee at the Regional Phthisiopulmonology Center                                                | 17 Franka Street, Ivano-Frankivsk, 76018, Ukraine                   | Koniuska M.                 |
|                                                            | Ethics Committee at the Municipal Institution "Kryvyi Rig                                                           | 2,30-year of Peremogy sq., Kryvyi Rig, 50056, Ukraine               | Tamamsheva A. O             |
|                                                            | Ethics Committee at the municipal institution "Dnipropetrovsk City Multidiscipline Clinical Hospital" of            | 31, Blyzhnia Str., Dnipropetrovsk, 49102, Ukraine                   | Shynkarenko M.              |
|                                                            | Poltava Regional Clinical Hospital named after M.V. Sklifosovsky                                                    | 23 Shevchenko Street, Poltava 36024, Ukraine                        | I.P. Kolomoets              |
| Local Ethics Committee of MI "City Hospital No. 7"         | 9, Lunacharsky str., 69118, Zaporizhzhya                                                                            | Julia Lyutyh                                                        |                             |
| Local Ethics Committee of municipal healthcare institution | 137, Gagarina str., 61124 Kharkiv                                                                                   | Olena Volodymyrivna Solodka                                         |                             |

**TRILOGY\_IEC/IRBs**

| <b>Country</b> | <b>CEC/LEC</b>                                                                                                      | <b>IRB/IEC Address</b>                           | <b>Name of Chairman</b>   |
|----------------|---------------------------------------------------------------------------------------------------------------------|--------------------------------------------------|---------------------------|
|                | Ethics Committee of Municipal Non-commercial Enterprise "Consulting and Diagnostic Center" of Desnianskyi District  | 3a, Balakireva lane, Kharkiv, 61018, Ukraine     | A.P. Zaizzhena            |
|                | Ethics Committee at the municipal institution "Dnipropetrovsk City Clinical Hospital No. 2" of                      | 53 Kaliniva Ave., Dnipropetrovsk, 49064, Ukraine | Leshchev Dmytro Petrovych |
|                | Ethics Committee of Public Institution "National Institute of Phthiology and Pulmonology named after F.H. Yanovskyi | 10, M.Amosova Str., Kyiv, 03680, Ukraine         | V.M. Melnyk               |
|                | Municipal Institution "Kherson City Clinical Hospital of E.E. Karabelesh"                                           | 22/1 Ushakova Str., Kherson 73000, Ukraine       | O.I. Demediuk             |
|                | Ethics Committee of Public Institution "National Institute of Phthiology and Pulmonology named after F.H. Yanovskyi | 10, M.Amosova Str., Kyiv, 03680, Ukraine         | V.M. Melnyk               |
|                | Ethics Committee of Public Institution "National Institute of Phthiology and Pulmonology named after F.H. Yanovskyi | 10, M.Amosova Str., Kyiv, 03680, Ukraine         | V.M. Melnyk               |
